# Supplementary material
Source: PubMed Central journal article supplement (PMC3225421)
Supplement: supp_183.17.1991_bcancer-tonelli-2-at.pdf [file supp_183.17.1991_bcancer-tonelli-2-at.pdf]

**Appendix 2 (as supplied by the authors): Canadian Task Force on Preventive Health Care recommendations concerning clinical breast exam and breast self exam**

|                                          |                                                                                                                                                                                                                                                                                                                                                                                                                                                                                                                                                   |                                                                                                                                        |                                                                                                                                                                                                                                                                                                                                                                                                                                                     |
|------------------------------------------|---------------------------------------------------------------------------------------------------------------------------------------------------------------------------------------------------------------------------------------------------------------------------------------------------------------------------------------------------------------------------------------------------------------------------------------------------------------------------------------------------------------------------------------------------|----------------------------------------------------------------------------------------------------------------------------------------|-----------------------------------------------------------------------------------------------------------------------------------------------------------------------------------------------------------------------------------------------------------------------------------------------------------------------------------------------------------------------------------------------------------------------------------------------------|
| <b>Population</b>                        | Women aged 40-74 without personal or family history of breast cancer, known BRCA1 or 2 mutation, or prior chest wall radiation                                                                                                                                                                                                                                                                                                                                                                                                                    |                                                                                                                                        |                                                                                                                                                                                                                                                                                                                                                                                                                                                     |
| <b>Burden of illness</b>                 | There were approximately 22,700 new cases of breast cancer and 5,400 deaths from breast cancer in Canada during 2009. Incidence and case-fatality rates increase with age.                                                                                                                                                                                                                                                                                                                                                                        |                                                                                                                                        |                                                                                                                                                                                                                                                                                                                                                                                                                                                     |
| <b>Intervention</b>                      | Routine Clinical Breast Exam by a health professional                                                                                                                                                                                                                                                                                                                                                                                                                                                                                             | Breast Self Exam                                                                                                                       | Magnetic Resonance Imaging                                                                                                                                                                                                                                                                                                                                                                                                                          |
| <b>Recommendation</b>                    | We recommend <u>not routinely performing</u> Clinical Breast Exam alone or in conjunction with mammography to screen for breast cancer.<br><br>(Weak recommendation; low quality evidence).                                                                                                                                                                                                                                                                                                                                                       | We recommend <u>not advising</u> women to routinely practice Breast Self Exam<br><br>(Weak recommendation; moderate quality evidence). | We recommend <u>not routinely screening with magnetic resonance imaging</u><br><br>(Weak recommendation; no evidence)                                                                                                                                                                                                                                                                                                                               |
| <b>Basis of Recommendation</b>           | No evidence was found indicating that Clinical Breast Exam or Breast Self Exam reduced breast cancer mortality or all-cause mortality. Two large trials identified no reduction in breast cancer mortality associated with teaching Breast Self Exam to women aged 31 to 64, but found evidence of increased harm for benign breast biopsy.<br>This recommendation reflects concerns with the potential harms of Clinical Breast Exam and Breast Self Exam and the corresponding lack of evidence of their effectiveness in decreasing mortality. |                                                                                                                                        | Since no studies demonstrate that the type of mammography influences the anticipated mortality reduction associated with screening, either digital or film mammography is acceptable. There are no data evaluating whether screening average-risk women with magnetic resonance imaging reduces mortality as compared with mammography or no screening. Therefore, screening average-risk women with magnetic resonance imaging is not recommended. |
| <b>Considerations for implementation</b> | Clinical Breast Exam remains appropriate when women present with, or physicians have concerns about, abnormal breast changes.                                                                                                                                                                                                                                                                                                                                                                                                                     |                                                                                                                                        |                                                                                                                                                                                                                                                                                                                                                                                                                                                     |
